# Supplementary material
Source: PubMed Central journal article supplement (PMC9160258)
Supplement: 41401_2021_763_MOESM1_ESM.pdf [file 41401_2021_763_MOESM1_ESM.pdf]

# Figure S1

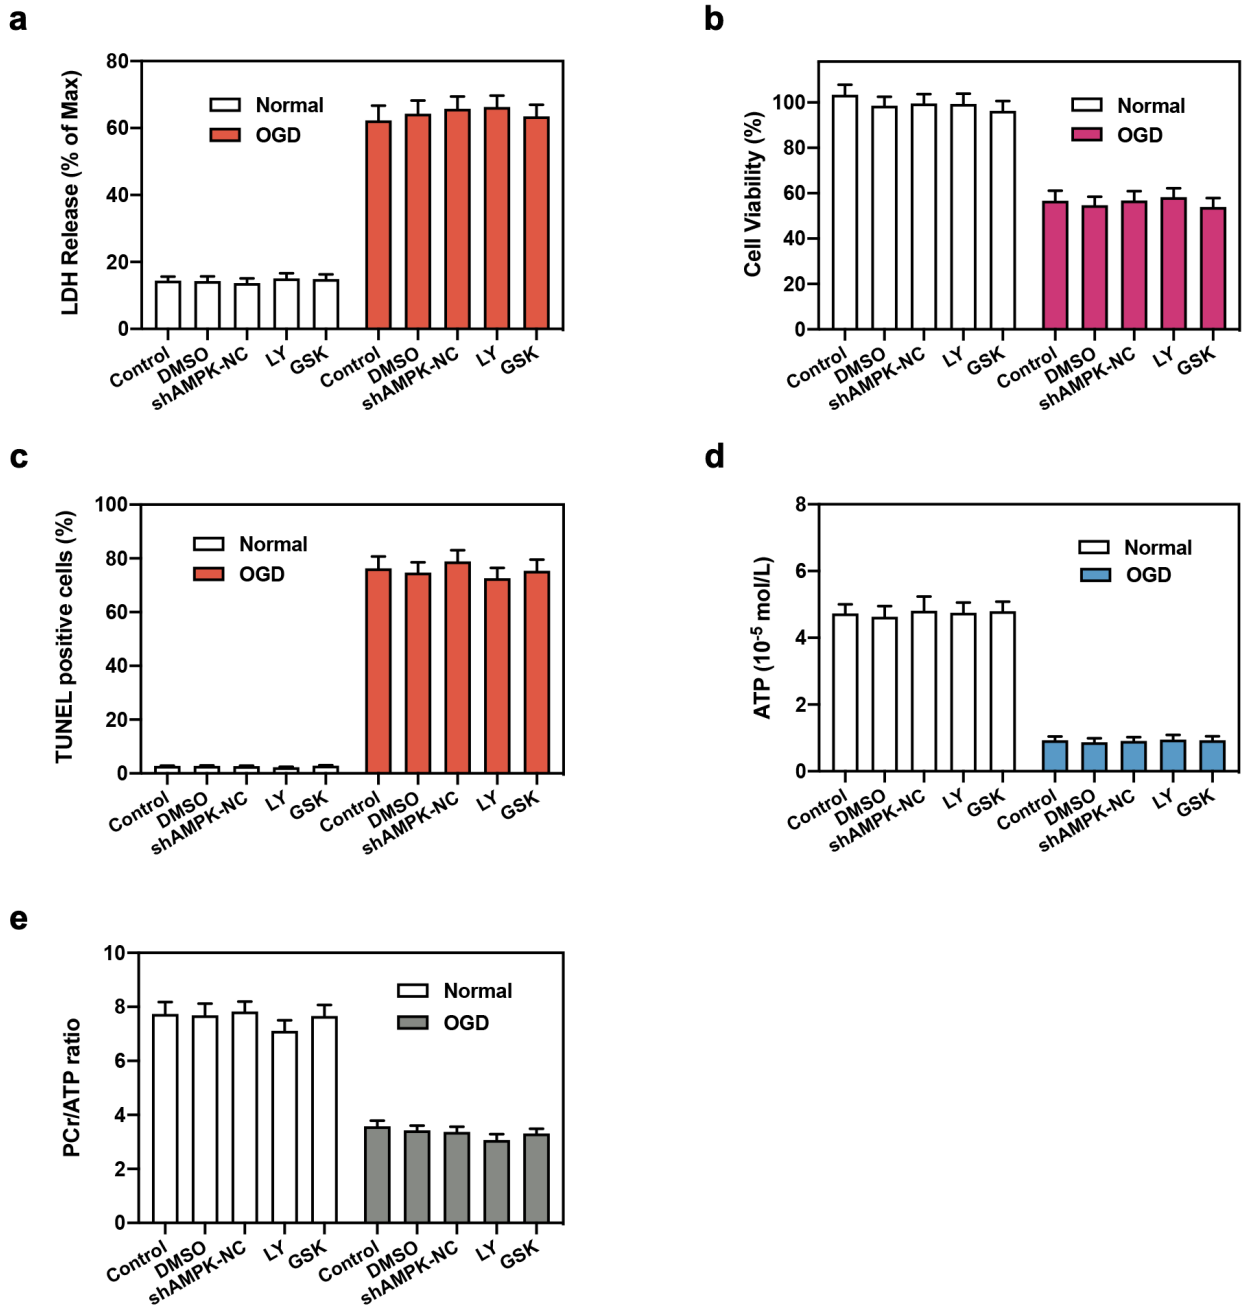

**Fig. S1. DMSO, shAMPK-NC, and PI3K/Akt inhibitors have no effect on cell function under normal and OGD conditions.** Isolated neonatal mouse cardiomyocytes were treated with DMSO, shAMPK-NC, LY204002 (LY; 20  $\mu$ mol/L), or GSK690693 (GSK; 10  $\mu$ mol/L), then subjected to OGD insult or not. (a-c) LDH release (a), cell viability (b), and TUNEL assay (c) were analyzed. (d and e) ATP level (d) was determined and PCr/ATP ratio was calculated (e).  $n = 5$  independent experiments. Data are presented as the mean  $\pm$  SEM.
